# Supplementary material for: Fine particulate matter (PM2.5) inhibits ciliogenesis by increasing SPRR3 expression via c-Jun activation in RPE cells and skin keratinocytes
Source: PubMed Central journal article supplement (PMC6408442; doi:10.1038/s41598-019-40670-y), 2019-03-08

**Fine particulate matter (PM2.5) inhibits ciliogenesis by increasing SPRR3  
expression via c-Jun activation in RPE cells and skin keratinocytes**

Ji-Eun Bae<sup>1,2†</sup>, Hyunjung Choi<sup>3†</sup>, Dong Woon Shin<sup>2</sup>, Hye-Won Na<sup>3</sup>, Na Yeon Park<sup>1</sup>, Joon Bum Kim<sup>1</sup>, Doo Sin Jo<sup>1</sup>, Min Ji Cho<sup>4</sup>, Jung Ho Lyu<sup>4</sup>, Jeong Ho Chang<sup>5</sup>, Eunjoo H. Lee<sup>2</sup>, Tae Ryong Lee<sup>3</sup>, Hyoung-June Kim<sup>3\*</sup>, and Dong-Hyung Cho<sup>1\*</sup>

Figure 3B

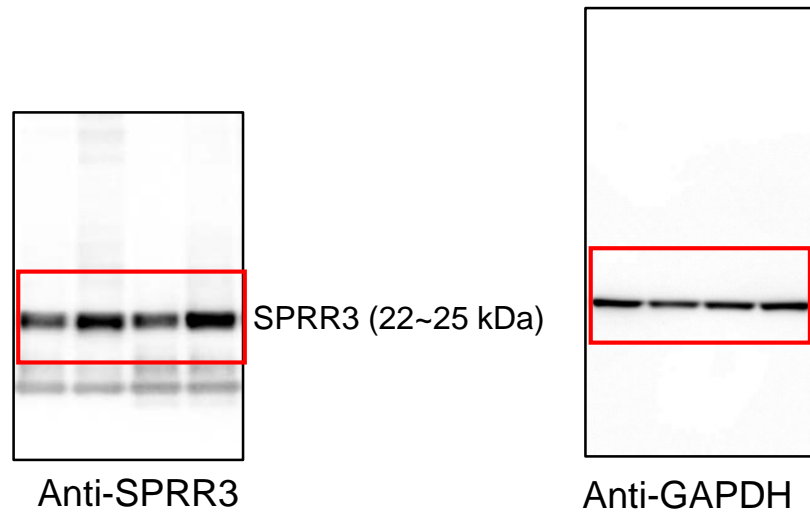

Figure 3C

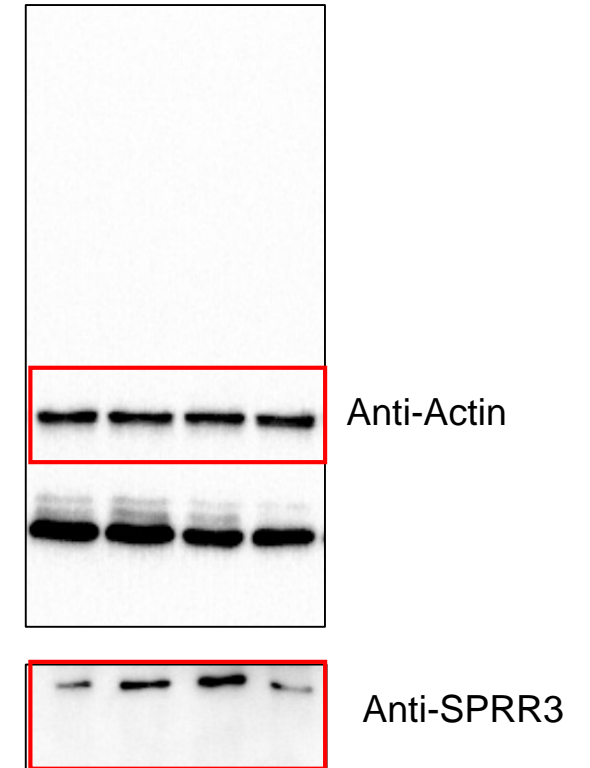

Figure 4A

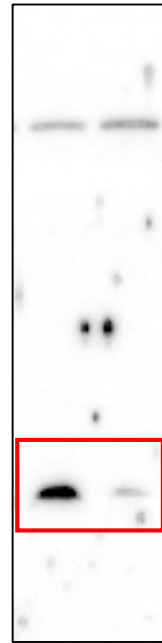

Anti-SPRR3

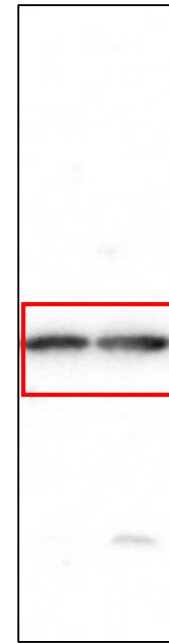

Anti-Actin

Figure 5A

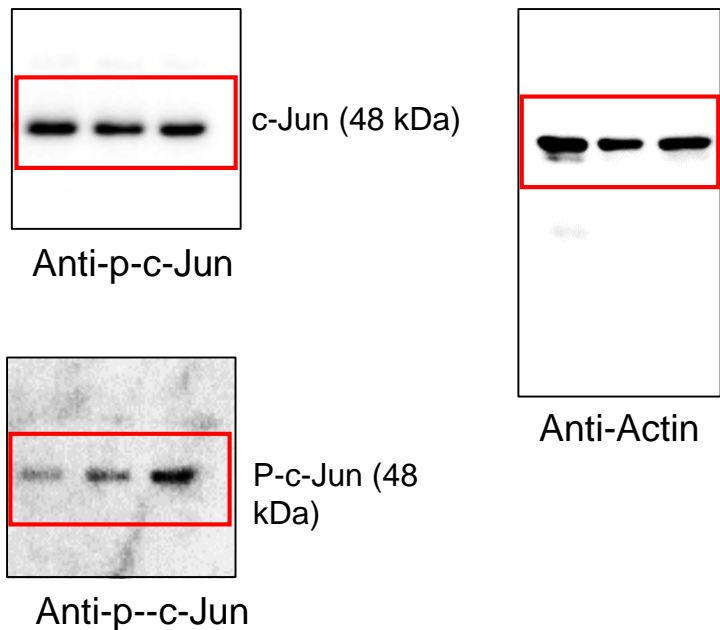

Figure 5B

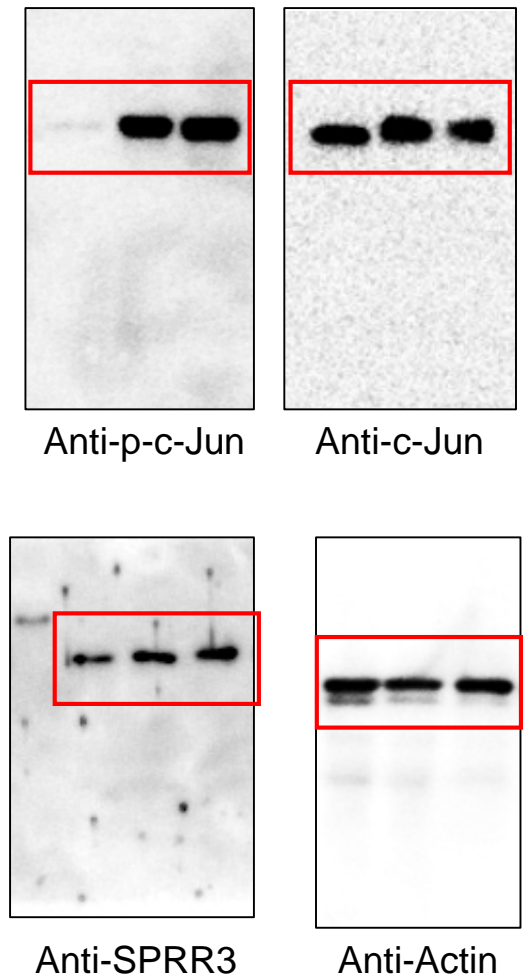

Figure 5C

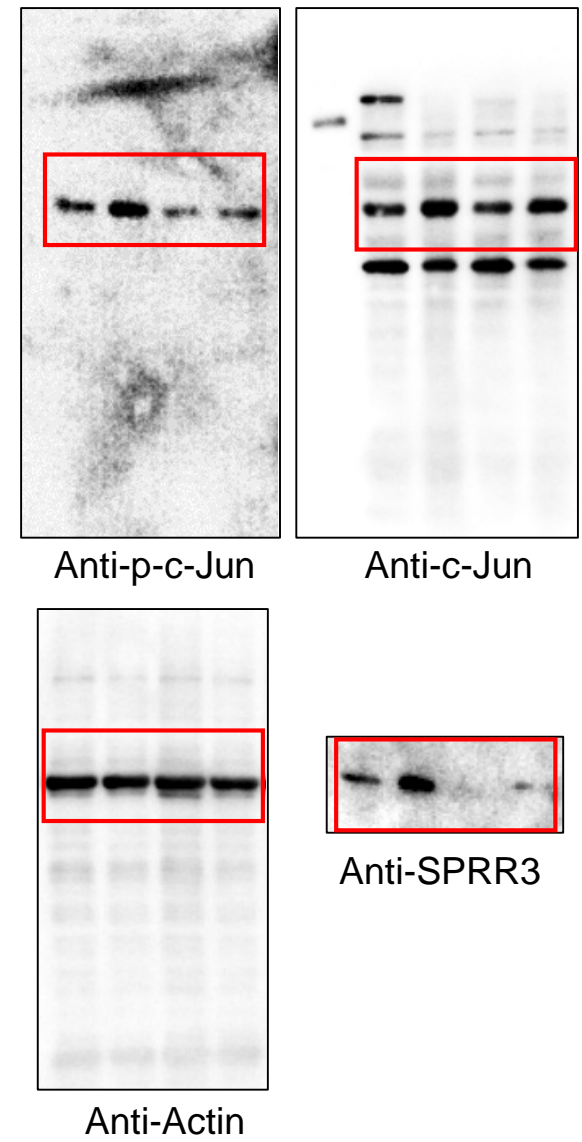

Supplement: 41598_2019_40670_MOESM1_ESM.pdf [file 41598_2019_40670_MOESM1_ESM.pdf]
